# Supplementary material
Source: Springer Nature journal article supplement (https://www.springermedizin.de/resource/supplementary/13041_2008_27_MOESM10_ESM.pdf/25657440)

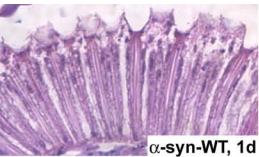

**A**

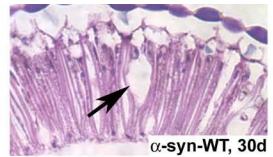

**B**

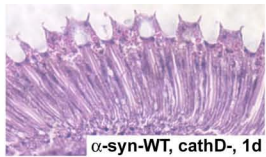

**C**

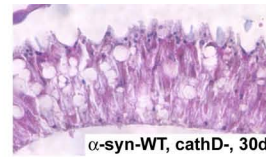

**D**

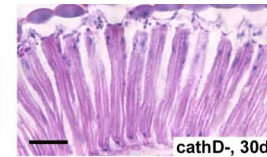

**E**

Supplement: MOESM10 [file 25657440]
